1 Age-Related Changes in the Rhesus Macaque Eye

2  
3 Kira H. Lin<sup>1</sup>, Tu Tran<sup>2</sup>, Soohyun Kim<sup>3</sup>, Sangwan Park<sup>3</sup>, Jiajia Chen<sup>2</sup>, J. Timothy Stout<sup>4</sup>, Rui  
4 Chen<sup>5,6</sup>, Jeffrey Rogers<sup>5</sup>, Glenn Yiu<sup>2</sup>, Sara Thomasy<sup>2,3</sup>, Ala Moshiri<sup>2\*</sup>

5 <sup>1</sup>William R. Pritchard Veterinary Medical Teaching Hospital, School of Veterinary Medicine,  
6 University of California-Davis, 1 Garrod Drive, Davis, CA 95695, USA

7 <sup>2</sup>Department of Ophthalmology & Vision Science, School of Medicine, U.C. Davis, Sacramento,  
8 California 95817, USA

9 <sup>3</sup>Department of Surgical and Radiological Sciences, School of Veterinary Medicine, University  
10 of California-Davis, Davis, California 95616, USA

11 <sup>4</sup>Department of Ophthalmology, Cullen Eye Institute, Baylor College of Medicine, Houston,  
12 Texas 77030, USA

13 <sup>5</sup>Human Genome Sequencing Center and Department of Molecular and Human Genetics, Baylor  
14 College of Medicine, Houston, Texas 77030, USA

15 <sup>6</sup>Department of Biochemistry and Molecular Biology, Baylor College of Medicine, Houston,  
16 Texas 77030, USA

17

18 \*Corresponding author:

19

20 Ala Moshiri M.D. Ph.D.

21 Department of Ophthalmology and Vision Science, School of Medicine

22 University of California at Davis, Eye Center

23 4860 Y. Street, Suite 2400

24 Sacramento, CA 95817

25 Phone: (916) 734-6074

26 Fax: (916) 734-6197

27 Email: amoshiri@ucdavis.edu

28

29 Running head: age-related ocular changes in rhesus macaques

30

31 Conflicts of interest: The authors declare no conflicts of interest related to this study.

32

33 Financial support: Ala Moshiri is supported by NIH K08 EY027463, NIH U24 EY029904, and  
34 Barr Foundation for Retinal Research. Sara M. Thomasy is supported by NIH R01 EY016134,  
35 and NIH U24 EY029904. Timothy Stout, Rui Chen, and Jeffrey Rogers are supported by NIH  
36 U24 EY029904. This research was also supported by an unrestricted grant from Research to  
37 Prevent Blindness to Baylor College of Medicine. Glenn C. Yiu is supported by NIH K08  
38 EY026101, NIH R21 EY031108, the Brightfocus Foundation, and Macula Society. Tu M. Tran  
39 was supported by Fight for Sight SS-19-001. No funding organizations had any role in the design  
40 or conduct of this research. The content is solely the responsibility of the authors and does not  
41 necessarily represent the official views of the funding agencies.

42

43 Acknowledgements: The authors thank Monica Motta and Michelle Ferneding for expertise in  
44 ophthalmic imaging, electrophysiology, data management, and research support.  
45

46 **Abstract**

47

48 *Purpose:* To assess age-related changes in the rhesus macaque eye and evaluate them to

49 corresponding human age-related eye disease.

50

51 *Methods:* Data from eye exams and imaging tests including intraocular pressure (IOP), lens

52 thickness, axial length, and retinal optical coherence tomography (OCT) images were evaluated

53 from 142 individuals and statistically analyzed for age-related changes. Quantitative

54 autofluorescence (qAF) was measured as was the presence of macular lesions as related to age.

55

56 *Results:* Ages of the 142 rhesus macaques ranged from 0.7 to 29 years (mean=16.4 years,

57 stdev=7.5 years). Anterior segment measurements such as IOP, lens thickness, and axial length

58 were acquired. Advanced retinal imaging in the form of optical coherence tomography and qAF

59 were obtained. Quantitative assessments were made and variations by age groups were analyzed

60 to compare with established age-related changes in human eyes. Quantitative analysis of data

61 revealed age-related increase in intraocular pressure, ocular biometry (lens thickness and axial

62 length), and presence of macular lesions. Age-related changes in thicknesses of retinal layers on

63 OCT were observed and quantified. Age was correlated with increased qAF.

64

65 *Conclusions:* The rhesus macaque has age-related ocular changes similar to humans. IOP

66 increases with age while retinal ganglion cell layer thickness decreases. Macular lesions develop

67 in some aged animals. Our findings support the concept that rhesus macaques may be useful for

68 the study of important age-related diseases such as glaucoma, macular diseases, and cone

69 disorders, and for development of therapies for these diseases.

70

71 **Introduction**

72           There are several human ocular diseases such as cataracts, glaucoma, and macular  
73   degeneration that are age-related and vision impairing. Cataracts are the leading cause of  
74   blindness globally (Khairallah et al., 2015). Previous models such as mice have been used to  
75   study the development of cataracts (Kuck, 1990), however structural differences between the  
76   mouse and human eye make the development of cataracts potentially anatomically different from  
77   one another. The short lifespan of the mouse also makes it a less ideal model to study potential  
78   clinical treatment of cataracts. The second most common cause of blindness globally is glaucoma  
79   (Cook and Foster, 2012). Although glaucoma spontaneously occurs in canines, the structural  
80   differences between canine and human suggest a different pathological process (Palko et al.,  
81   2016). Because of structural differences of the optic nerve head (lamina cribrosa) between  
82   primates and rodents, as well as dissimilarities between primate and rodent retinal ganglion cell  
83   subtypes, rodent models of glaucoma have significant limitations in the degree to which they are  
84   translatable to the human disease. Age related macular degeneration is the largest cause of  
85   blindness in the United States. Macular degeneration is a uniquely human disease as most  
86   mammals lack complete macular specialization. The non-human primates (NHPs) are the only  
87   other mammalian species to have a macula, thus highlighting their requirement as a model for  
88   studying macular diseases. Due to the similarities between ocular structures and patterning  
89   within primates, it would be beneficial to have primate model systems which replicates age-  
90   related changes seen in the human eye.

91           In order to determine the degree to which these age-related pathologies occur in NHPs,  
92   we performed eye exams and imaging tests on rhesus macaques at the Vision Science Laboratory  
93   of the California National Primate Research Center (CNPRC) at UC Davis. We examined both  
94   eyes of 142 primates of various ages and performed quantitative analysis of the measured data

95 compared to age. Our investigation showed that the rhesus macaque eye undergoes age-related  
96 changes corresponding to the most common causes of blindness seen in humans: cataracts,  
97 glaucoma, and early stages of macular degeneration.

98

## 99 **Methods**

100

### 101 *Animals*

102 All of the animals in this study were rhesus macaques (*Macaca mulatta*) born and  
103 maintained at the California National Primate Research Center (CNPRC). The CNPRC is  
104 accredited by the Association for Assessment and Accreditation of Laboratory Animal Care  
105 (AAALAC) International. Guidelines of the Association for Research in Vision and  
106 Ophthalmology Statement for the Use of Animals in Ophthalmic and Vision Research were  
107 followed. All aspects of this study were in accordance with the National Institutes of Health  
108 (NIH) Guide for the Care and Use of Laboratory Animals. Phenotyping and ophthalmic  
109 examinations were performed according to an animal protocol approved by the UC Davis  
110 Institutional Animal Care and Use Committee.

111

### 112 *Ophthalmic Data Collection*

113 Phenotypic data were collected from primates previously catalogued for identification of  
114 inherited retinal diseases (Moshiri et al., 2019). A small minority of the animals in this study  
115 overlapped with a previous study at CNPRC (Yiu et al., 2017). Sedated ophthalmic examination  
116 included measurement of intraocular pressure using rebound tonometry (Icare TA01i, Finland),  
117 pupillary light reflex testing, external and portable slit lamp examination, as well as dilated  
118 (Tropicamide 1%, Phenylephrine 2.5%, Cyclopentolate 1%) indirect ophthalmoscopy. Axial  
119 length and lens thickness were measured using a Sonomed Pacscan Plus (Escalon, Wayne, PA,

120 United States). Sedation was achieved by intramuscular injection of ketamine hydrochloride (5-  
121 30 mg/kg IM) and dexmedetomidine (0.05-0.075 mg/kg IM). Animals were monitored by a  
122 trained technician and a veterinarian at all times.

123 Color and red-free fundus photographs were obtained with the CF-1 Retinal Camera with  
124 a 50° wide angle lens (Canon, Tokyo, Japan). Spectral-domain optical coherence tomography  
125 (SD-OCT) with confocal scanning laser ophthalmoscopy (cSLO) was also performed  
126 (Spectralis® HRA+OCT, Heidelberg, Germany). A 30-degree horizontal high-resolution raster  
127 scan centered on the fovea was obtained using a corneal curvature (K) value of 6.5 mm radius.  
128 The Heidelberg eye tracking Automatic Real-Time (ART) software was set at 25 scans for each  
129 B-scan acquired. All imaging was done by the same ophthalmic imaging team. All OCT images  
130 were taken through the center of the pupil. Speculums were used and corneal hydration was  
131 maintained through application of topical lubrication (Gentel artificial tears) approximately  
132 every 1-2 minutes during imaging sessions. Focal measurements of each retinal layer thickness  
133 were performed using the caliper measurement tool in ImageJ (National Institutes of Health,  
134 Bethesda, MD, United States) on a horizontal line scan through the foveal center. The foveal  
135 center was determined on optical coherence tomographic images where the fovea had the  
136 greatest depth. The manufacturer's scale on the OCT image was used to calibrate ImageJ prior to  
137 taking measurements of each layer. Each retinal layer thickness was measured at 1.5mm  
138 temporal to the foveal center, at the foveal center, and 1.5mm nasal to the foveal center. The  
139 layers measured included the nerve fiber layer (NFL), ganglion cell layer (GCL), inner plexiform  
140 layer (IPL), inner nuclear layer (INL), outer plexiform layer (OPL), outer nuclear layer (ONL),  
141 photoreceptor inner segments (IS), photoreceptor outer segments (POS), retinal pigmented  
142 epithelium (RPE), choriocapillaris (CC), outer choroid (OC), and total retinal thickness (TRT).

143 The thickness of each layer was segmented manually and measured boundary to boundary (Litts  
144 et al., 2018; Staurenghi et al., 2014). As reported previously, the choroidal-scleral junction  
145 cannot be reliably visualized in every animal, which may confound OC measurements (Yiu et al.  
146 2017). Averages were calculated for each layer at each location for each eye of each individual  
147 primate.

148 The Spectralis device was also used to obtain blue-peak fundus autofluorescence in a  
149 quantitative fashion. After SD-OCT images were captured, the device was turned to qAF mode  
150 to capture 30° x 30° qAF images. The device was calibrated with an internal master fluorescence  
151 reference and set to excitation light of 488 nm and a long-pass barrier filter starting at 500 nm  
152 increasing to 80 nm. The retina was exposed to 488 nm blue excitation light for 30 seconds to  
153 achieve photobleaching. Intensity was adjusted for using an internal fluorescence reference to  
154 enable quantification of autofluorescence (AF) and normalizing AF units. Images were captured  
155 from the central macula with minor variations in laser power and detector sensitivity in between  
156 imaging sessions. Each eye had three series of 12 rapid succession images acquired and the mean  
157 of the three sequences were calculated using the manufacturer's qAF software. We occasionally  
158 encountered opacities in ocular media that limited the quality of imaging. Quantitative  
159 autofluorescence (qAF) images were chosen based on grading between two individuals (K.H.L.  
160 and T.M.T.). Images were graded from 0-3 (0 being ineffectual and 3 being high quality) with  
161 only images of a grade of 2 or above being evaluated. Acceptable images were measured using a  
162 Delori grid centered on the fovea and expanded to the tangential edge of the optic nerve. The  
163 main measure for each image is the qAF8, which was acquired after selecting the middle eight  
164 segments to exclude vessels and other noise and calculating the mean value. The mean qAF8

165 value was calculated as the mean of the three images per eye and averaged between the two  
166 graders.

167

### 168 *Histology*

169 The enucleated eye was dissected to isolate the macula and immediately fixed using freeze  
170 substitution and embedded in paraffin as previously described (Sun et al., 2015). The macular  
171 region was sectioned at 5  $\mu\text{m}$  on a microtome and sections collected on slides and dried. Using  
172 standard protocols, sections were treated with cold acetone, hematoxylin, 0.5% HCl in 70%  
173 ethanol, eosin, 95% and 100% ethanol and Histo-Clear for light microscopic examination.

174

### 175 *Statistical Analysis*

176 Descriptive statistics were used to evaluate age-related changes. Panel regression was  
177 used to determine statistical significance ( $P < 0.05$ ) treating each eye as the unit of analysis  
178 linked by the primate to account for within-subject correlation, and each primate's panel  
179 consisted of right eye and left eye measurements when applicable. Analyses were performed in  
180 Microsoft Excel (Microsoft Corporation, Redmond, WA, United States) and STATA 16  
181 (StataCorp, College Station, TX, United States).

182

## 183 **Results**

184 Data were collected from a total of 142 individuals. Ages of the rhesus macaques ranged  
185 from 0.7 to 29 years (mean = 16.4 years, stdev = 7.5 years). The age distribution is shown in  
186 Table 1.

187 Intraocular pressure (IOP) measurements were collected from a total of 142 individuals,  
188 284 eyes. We found that IOP increased (Figure 1) by 0.165 mm Hg per each year of age ( $P <$



189 0.001). Lens thickness and axial length measurements were collected from 114 individuals, 228  
190 eyes total. Lens thickness measurements suggested a positive correlation with age, with an  
191 increase of  $7.3 \pm 5.2 \mu\text{m}$  per year in age ( $P = 0.162$ , Figure 2A). Axial length increased by  $52.8 \pm$   
192  $11.3 \mu\text{m}$  per year of age ( $P < 0.001$ , Figure 2B).

193

#### 194 *Retinal Findings*

195 Fundus imaging was evaluated on 78 individuals (77 right eyes, 78 left eyes).  
196 Observations by indirect ophthalmoscopy revealed yellow-white punctate macular lesions of  
197 likely lipoidal degeneration (Anderson et al., 2006; Curcio et al., 2010; Rudolf et al., 2019; Yiu  
198 et al., 2017; Yiu et al., 2020) present in 66 individuals (age range = 4.2-29.4 years, mean age =  
199 17.8 years, median age = 19.3 years, 47% of total study subjects). These lesions, reminiscent of  
200 small hard drusen in humans, were identifiable on fundus imaging (Figure 3A-D & 4) and were  
201 distinct from soft drusen-like macular lesions (Figure 3E) observed in a smaller subset of  
202 animals. Hematoxylin and eosin stain of a histological section of a rhesus macaque retina  
203 clinically graded with extensive punctate macular lesions shows numerous translucent spheroidal  
204 lesions on the apical aspect of the retinal pigmented epithelium cells, near the junction of the  
205 photoreceptor outer segments (Figure 3F). Animals with extensive punctate macular lesions had  
206 granular hyperreflective foci seen in the RPE band on OCT. Autofluorescence imaging, fundus  
207 photos, and an OCT scan through the macular lesions are shown in Figure 4, in contrast to that  
208 seen in animals with no macular lesions (Supplemental Figure 1). There were 74 individuals  
209 without punctate macular lesions (age range = 0.7-27.8 years, mean age = 14.6 years, median age  
210 = 18.8 years). The age distributions of individuals with and without punctate macular lesions are  
211 shown in Figure 5A. Forty-two individuals had punctate macular lesions visible by indirect

212 ophthalmoscopy and on fundus images. The mean age of the animals with punctate macular  
213 lesions ( $17.8 \pm 6.2$  years) was significantly older than the mean age of animals without them  
214 ( $14.6 \pm 8.1$  years), suggesting punctate macular lesions are an age-related phenomenon ( $P =$   
215  $0.009$ ) (Anderson et al., 2006; Curcio et al., 2010; Yiu et al., 2017; Yiu et al., 2020). Further  
216 grouping of individuals with various degrees (clinically graded by indirect ophthalmoscopy as  
217 few, moderate, or extensive) of punctate macular lesions is shown in Figure 5B. While the  
218 presence of punctate macular lesions may be age-related, the extensiveness of punctate macular  
219 lesions may not correlate solely with age.

220

221

#### 222 *Optical Coherence Tomography Segmentation*

223 Tomographic images of the macula were evaluated on 60 individuals, 49 right eyes and  
224 49 left eyes. To determine if there are structural changes in the retina over time, individual retinal  
225 layer thicknesses were plotted against age (Figures 6 & 7). Significant changes in layer thickness  
226 with increase in age were found in the retinal ganglion cell layer (GCL), inner nuclear layer  
227 (INL), photoreceptor outer segments (POS), choriocapillaris (CC), and outer choroid (OC)  
228 consisting of both the Sattler and Haller layers of the choroid. Significant reduction in thickness  
229 was found in the GCL both nasal ( $P = 0.019$ ) and temporal ( $P = 0.001$ ) to the fovea. The nasal  
230 side decreased by  $0.30 \mu\text{m}$  and the temporal side by  $0.37 \mu\text{m}$  for each year of age. The thickness  
231 of the INL reduced only temporal to the foveal by  $0.19 \mu\text{m}$  per year of age ( $P = 0.025$ ). The POS  
232 increased in thickness on the nasal side ( $0.16 \mu\text{m}$  per year,  $P = 0.003$ ), temporal side ( $0.26 \mu\text{m}$   
233 per year,  $P < 0.001$ ), and foveal center ( $0.36 \mu\text{m}$  per year,  $P < 0.001$ ). The CC thickness  
234 increased in the nasal side ( $0.34 \mu\text{m}$  per year,  $P < 0.001$ ), temporal side ( $0.38 \mu\text{m}$  per year,  $P <$   
235  $0.001$ ), and foveal center ( $0.27 \mu\text{m}$  per year,  $P < 0.001$ ). Finally, the OC thickness increased in

236 the nasal side (3.66  $\mu\text{m}$  per year,  $P < 0.001$ ), temporal side (3.20  $\mu\text{m}$  per year,  $P < 0.001$ ), and  
237 foveal center (3.58  $\mu\text{m}$  per year,  $P < 0.001$ ). The other layers were not found to vary significantly  
238 with age.

239

#### 240 *Quantitative Autofluorescence (qAF) analysis*

241 The qAF8 data of 66 eyes of 44 individuals was evaluated. An image of the Delori grid in  
242 Heidelberg's qAF mode is shown in Figure 8A. qAF8 consisted of the 8 segments of the middle  
243 ring of the pattern computed to a mean (Gliem et al., 2016). We observed an increase in qAF8 by  
244 a factor of 1.021 units per year of age ( $P = 0.006$ , Figure 8B).

245

## 246 **Discussion**

247

### 248 *Age-related changes in Intraocular Pressure (IOP), Lens Thickness, and Axial Length*

249 It is believed that rhesus macaques age about 3 times faster than humans (Simmons,  
250 2016). They generally reach adulthood (sexual maturity) by 5 years, are considered geriatric after  
251 20 years, and can live up to 30 years. In our cohort of macaques, we observed a significant  
252 increase in IOP with age ( $P < 0.005$ ). A similar trend in humans has been reported across  
253 ethnicity (Wong et al., 2009; Klein et al., 1992). Consistent with prior reports, we also observed  
254 a positive trend of the proportion of primates that had an IOP  $>21$  mm Hg. One primate in age-  
255 group 5-9 years old (6%), 4 primates in age-group 10-14 years old (19%), 5 primates in age-  
256 group 15-19 years old (18%), and 16 primates in age-group 20-24 years old (34%) were  
257 observed to have an IOP  $>21$  mm Hg in at least one of their eyes. Age-group 25-30 years old had  
258 3 primates (25%) that had an IOP  $>21$  mm Hg, but given the advanced age of these primates this  
259 group was small. This age-related IOP elevation suggests that rhesus macaques may develop  
260 corresponding optic nerve damage similar to primary open angle glaucoma. Furthermore, we did

261 find thinning of the retinal ganglion cell layer with age in this study. Dawson et al. (1993) also  
262 found evidence of primary open angle glaucoma within a closed colony of rhesus monkeys on  
263 the island of Cayo Santiago. Thirty-one individuals had elevated intraocular pressures of  $\geq 21$   
264 mm Hg. However, they did not find any age-related significance within the affected individuals.  
265 A normative primate and ocular hypertensive primate were examined in greater depth and the  
266 hypertensive individual showed decreased optic nerve fibers and reduced axon densities at  
267 various sites.

268 It has been shown that the fully developed normal human lens is 4.0 mm in thickness at  
269 age 20, but increases to 4.3 mm at the age 40 of years, 4.45 mm at 50 years, 4.7 mm at 60 years,  
270 and above 4.7 mm after 60 years of age (Levin et al., 2011). The rate of increase in crystalline  
271 lens thickness has been estimated at 0.15–0.20 mm per decade of life (Roters et al., 2002). The  
272 macaque lens is  $4.24 \pm 0.41$  mm in thickness with an average age of 15.7 years. A previous study  
273 in a smaller cohort of rhesus monkeys found a significant age-related increase of  $0.03 \pm 0.01$  mm  
274 per year ( $P = 0.002$ ) in lens thickness (Wendt et al., 2008). However, lens thickening with age  
275 did not meet statistical significance in our cohort ( $P = 0.162$ ).

276 The average axial length measurement of the rhesus eye was determined to be  $19.77 \pm$   
277  $0.97$  mm with a significant age-related increase of  $52.8 \mu\text{m}$  per year ( $P < 0.001$ ). The average  
278 axial length for animals aged 0-4 was  $18.89 \pm 0.83$  mm while the animals age 25-30 measured  
279  $20.28 \pm 0.97$  mm. In humans, the newborn eye is 16 mm and continues to grow to approximately  
280 24 mm (Goldschmidt, 1969). In humans, age-related axial length increase causes myopia, and  
281 this process can lead to pathological consequences and vision loss (Flores-Moreno et al., 2013;  
282 Mutti et al., 2007; Ohno-Matsui, 2016; Silva, 2012). We did observe rare examples of high  
283 myopia in our cohort of monkeys and among normal eyes axial length did increase similar to

284 what has been reported in the clinical literature. Therefore, rhesus monkeys may serve as  
285 reasonable models for the study of normal axial length increase and potentially also for  
286 pathologic myopia (Smith et al., 2012).

287  
288 *Age-related changes on Retinal OCT and qAF*

289 Drusen are lesions characteristic of age-related macular degeneration (AMD). Our cohort  
290 of rhesus macaques had punctate macular lesions, which appear to be an age-related  
291 phenomenon as the group of animals with them were significantly older than those without them.  
292 However, they could occur even in young animals and the extensiveness of these lesions did not  
293 correlate with age, suggesting genetic or environmental factors may also be involved. Punctate  
294 macular lesions seem to correspond to vacuolated spherules at the apical aspect of the RPE cells  
295 on histopathology, and animals with these lesions have granular hyperreflectivity of the RPE  
296 band on OCT. Rudolf et al. reported essentially identical fundus lesions which corresponded  
297 histologically to lipoidal degeneration of individual discrete RPE cells. These lesions had no  
298 discernible RPE band alteration on OCT, perhaps due to differences in image acquisition. The  
299 punctate lesions in our cohort likely represent the same biological process. Soft drusen-like  
300 lesions more reminiscent of those seen in humans with AMD were also observed, but only in a  
301 smaller cohort of geriatric animals. The presence of drusen in humans is associated with age and  
302 their development is similar to other age-related disease processes (Anderson et al., 2002). As  
303 soft drusen-like lesions were only observed in geriatric animals, we believe they may represent  
304 early AMD in rhesus macaques. Examples of advanced AMD, geographic atrophy or choroidal  
305 neovascularization, were not seen in this study. The lack of geographic atrophy or choroidal  
306 neovascularization in this study is consistent with these forms of advanced AMD not having

307 been seen in any of the published surveys of macaque eyes, except in the context of pathologic  
308 myopia (Stafford et al. 1984).

309 We found significant decreases in layer thickness with age in the GCL and also in the  
310 temporal INL. Significant increases in thickness were found in the POS, CC, and OC. Demirkaya  
311 et al. (2013) showed that humans also have a significant decrease in the pericentral GCL and  
312 peripheral INL. However, their study also found a decrease in foveal POS layer thickness  
313 contrary to our data. Furthermore, Patel et al. (2014) found significant age-related thinning of the  
314 NFL layer, while our cohort showed no significant changes in this layer with age. The choroidal  
315 thickening with age in this study is at odds with human aging data (Ramrattan et al., 1994; Ruiz-  
316 Medrano et al., 2017) and may be due to the difficulty in measuring the choroidal-scleral  
317 junction in NHPs. The discrepancies could be due to true species differences, or secondary to a  
318 broader range of subjects in our study. The different methods of measuring layer thickness may  
319 also play a role as both human studies used an automated measuring program while our layers  
320 were measured manually. Variability in the precise definitions of retinal layer boundaries may  
321 also play a role.

322 In rhesus macaques, qAF was significantly lower than in humans with the average of 91.4  
323 qAF units in rhesus macaques compared to a human mean of 253.6-283.9 qAF units (Greenberg  
324 et al., 2013; Wang et al., 2019). We did observe an increase in qAF with increasing age  
325 consistent with human data (Armenti et al., 2016; Greenberg et al., 2013; Wang et al., 2019).  
326 However, we did not observe a continuous decline in qAF units, which occurs at age 75 years in  
327 humans (Table 3, Armenti et al., 2015). The higher qAF in humans may be due to higher  
328 absolute age in humans which may allow for decades of accumulation of lipofuscin.

329 Alternatively, visual cycle metabolism in the outer retina, levels of melanin in the choroidal  
330 layer, or other species-specific differences may be responsible for these qAF observations.

331         The age-related changes in the rhesus macaque eye show consistent similarities to its  
332 human counterpart. Age-related changes documented in humans such as IOP elevation, axial  
333 length increase, presence of punctate macular lesions, soft drusen-like lesions, and increasing  
334 qAF were confirmed in the eye of rhesus macaques. Our findings support the use of the NHP eye  
335 as a model for advanced translational vision science research, especially those related to macular  
336 and cone-disorders and age-related eye diseases.

337

338

339

340 **Figure Legends**

341

342

343 **Figure 1.** Intraocular pressure increases with age in rhesus macaques

344 Scatterplot showing relationship of age (years) and intraocular pressure (mm Hg) for 142

345 macaques, 284 eyes. IOP increased by 0.165 mm Hg per increase in year of age ( $P < 0.001$ ). A

346 linear regression line is fitted with a 95% confidence interval in the grey area.

347

348 **Figure 2.** Age-related changes in ocular biometry

349 (A) Scatterplot showing relationship between age (years) and lens thickness (mm) ( $n = 114$

350 primates, 228 eyes). The lens thickness increases  $7.3 \mu\text{m}$  per increase in year of age ( $P = 0.162$ ).

351 (B) Scatterplot showing relationship between age (years) and axial length (mm) ( $n = 114$

352 primates, 228 eyes). The axial length increases  $52.8 \mu\text{m}$  per increase in year of age ( $P < 0.001$ ).

353 A linear regression line that has been fitted with a 95% confidence interval is shown in the grey  
354 area of each graph.

355

356

357

358 **Figure 3.** Macular lesions in rhesus macaques

359 Grading of macular lesions by clinical examination based on number and area of the posterior

360 pole involved. Inset in A-E is a magnification of the foveal center (dashed box in A) highlighting

361 the lesions.

362 (A) Color fundus photo Group 0: no punctate macular lesions.

363 (B) Color fundus photo Group 1: few punctate macular lesions, typically limited to the foveal  
364 avascular zone.

365 (C) Color fundus photo Group 2: moderate punctate macular lesions, typically in the fovea with  
366 a few outside the foveal avascular zone.

367 (D) Color fundus photo Group 3: extensive punctate macular lesions, typically in the fovea and  
368 throughout the macula.

369 (E) Color fundus photo Group 4: soft drusen-like macular lesions.

370 (F) Hematoxylin and eosin stain of a histological section of a rhesus macaque retina clinically  
371 graded with extensive punctate macular lesions. Numerous translucent spheroidal lesions in the  
372 outer retina in the region of the photoreceptor outer segments and the retinal pigmented  
373 epithelium are seen (yellow arrows). The section is from the macular region as evidenced by  
374 multiple rows of nuclei in the retinal ganglion cell layer.

375

376

377 **Figure 4.** Multimodal retinal imaging of punctate macular lesions

378 Imaging of punctate macular lesions by (A) fundus autofluorescence, (B) red-free and (C) color  
379 fundus imaging in an animal clinically graded as extensive. Enlarged inset images show lesions  
380 in the fovea. Optical coherence tomography (D) shows punctate hyperreflectivity at the level of  
381 the RPE (red arrows) in the enlarged inset demarcated by the red box.

382

383

384 **Figure 5** Macular lesions and age distribution



385 (A) Age distribution of rhesus macaques with and without punctate macular lesions ( $P = 0.009$ ).  
386 No punctate macular lesions ( $n = 74$ , age range = 0.7-27.8 years, mean age = 14.6 years, median  
387 age = 18.8 years). Punctate macular lesions ( $n = 66$ , age range = 4.2-29.4 years, mean age = 17.8  
388 years, median age = 19.3 years). Macaques with punctate macular lesions = 47% of total study  
389 primates. Line represents mean age.

390 (B) Age distribution of rhesus macaques with various levels of punctate macular lesions. Group  
391 0: no punctate lesions ( $n = 74$ , age range = 0.7-29.0 years, mean age = 14.6 years, median age =  
392 19.8 years). Group 1: few lesions ( $n = 30$ , age range = 4.2-23.3 years, mean age = 14.9 years,  
393 median age = 16.0 years). Group 2: moderate lesions ( $n = 19$ , age range = 11.6-28.1 years, mean  
394 age = 20.9 years, median age = 21.3 years). Group 3: extensive lesions ( $n = 9$ , age range = 6.5-  
395 26.3 years, mean age = 14.7 years, median age = 13.1 years). Group 4: soft drusen-like macular  
396 lesions ( $n = 8$ , age range = 20.0-29.4 years, mean age = 24.6 years, median age = 24.3 years).  
397 Line represents mean age.

398  
399

400

401

402 **Figure 6.** Optical Coherence Tomography (OCT) images and measurements

403 (A) Measurement of retinal and choroidal layers ( $n = 60$  primates, 98 eyes). All retinal layers  
404 were measured at 1.5 mm on both temporal and nasal sides and in the foveal center. Total retinal  
405 thickness is measured from the nerve fiber layer (NFL) to the retinal pigment epithelium (RPE).  
406 Total retinal thickness caliper is shown at 1.5 mm eccentricity.

407

408

409 **Figure 7.** Scatterplots show the relationship between age (years) and the thickness of each layer  
410 ( $\mu\text{m}$ ).

411 (A) Nasal GCL decreased by a factor of 0.30  $\mu\text{m}$  per increase in year of age ( $P = 0.019$ ).

412 (B) Temporal GCL decreased by a factor of 0.37  $\mu\text{m}$  per increase in year of age ( $P = 0.001$ ).

413 (C) Temporal INL decreased by a factor of 0.19  $\mu\text{m}$  per increase in year of age ( $P = 0.025$ ).

414 (D) Nasal POS increased by a factor of 0.16  $\mu\text{m}$  per increase in year of age ( $P = 0.003$ ).

415 (E) Temporal POS increased by a factor of 0.26  $\mu\text{m}$  per increase in year of age ( $P < 0.001$ ).

416 (F) Foveal POS increased by a factor of 0.36  $\mu\text{m}$  per increase in year of age ( $P < 0.001$ ).

417 (G) Nasal CC increased by a factor of 0.34  $\mu\text{m}$  per increase in year of age ( $P < 0.001$ ).

418 (H) Temporal CC increased by a factor of 0.38  $\mu\text{m}$  per increase in year of age ( $P < 0.001$ ).

419 (I) Foveal CC increased by a factor of 0.27  $\mu\text{m}$  per increase in year of age ( $P < 0.001$ ).

420 (J) Nasal OC increased by a factor of 3.66  $\mu\text{m}$  per increase in year of age ( $P < 0.001$ ).

421 (K) Temporal OC increased by a factor of 3.20  $\mu\text{m}$  per increase in year of age ( $P < 0.001$ ).

422 (L) Foveal OC increased by a factor of 3.58  $\mu\text{m}$  per increase in year of age ( $P < 0.001$ ).

423

424

425

426 **Figure 8.** Quantitative autofluorescence analysis ( $n = 44$  primates, 66 eyes)

427 (A) To acquire qAF8, the eight middle segments (numbered octants) of the perifoveal Delori grid  
428 was used in Heidelberg's qAF mode. The center circle is placed over the foveal center and the  
429 grid is expanded until it touches the tangential edge of the optic nerve. Vessels are automatically

430 excluded and the qAF measurements in each octant are normalized to the internal  
431 autofluorescence standard shown in the blue bar at the top of the image.  
432 **(B)** Scatterplot showing relationship between qAF8 and age (years). Mean (standard deviation):  
433 91.4 (31.3). The mean qAF8 increased by a factor of 1.021 autofluorescence units per increase in  
434 year of age ( $P = 0.006$ ). A linear regression line has been fitted with a 95% confidence interval in  
435 the grey area.  
436

437 **Supplemental Figure 1.** Fundus without Macular Lesions

438 **(A)** Autofluorescence Image

439 **(B)** Red-free Fundus Photo

440 **(C)** Color Fundus Photo

441 **(D)** OCT Scan

442

443 **Tables**

| Age range   | # of NHPs |
|-------------|-----------|
| 0-4 years   | 16        |
| 5-9 years   | 18        |
| 10-14 years | 21        |
| 15-19 years | 28        |
| 20-24 years | 47        |
| 25-30 years | 12        |

444

445 **Table 1.** Age distribution of rhesus macaques (n = 142) by age. The mean was 16.4 years (stdev  
446 = 7.5 years). Median was 19.2 years.

447

| Retinal Layer | Slope Coefficient ( $\mu\text{m}$ per increase in year of age) | P-value | Correlation Coefficient |
|---------------|----------------------------------------------------------------|---------|-------------------------|
| Nasal GCL     | -0.30                                                          | 0.019   | 0.56                    |
| Temporal GCL  | -0.37                                                          | 0.001   | 0.74                    |
| Temporal INL  | -0.19                                                          | 0.025   | 0.78                    |
| Nasal POS     | 0.16                                                           | 0.003   | 0.81                    |
| Temporal POS  | 0.26                                                           | <0.001  | 0.76                    |
| Foveal POS    | 0.36                                                           | <0.001  | 0.51                    |
| Nasal CC      | 0.34                                                           | <0.001  | 0.56                    |
| Temporal CC   | 0.38                                                           | <0.001  | 0.56                    |
| Foveal CC     | 0.27                                                           | <0.001  | 0.75                    |
| Nasal OC      | 3.66                                                           | <0.001  | 0.28                    |
| Temporal OC   | 3.20                                                           | <0.001  | 0.74                    |
| Foveal OC     | 3.58                                                           | <0.001  | 0.60                    |

448

449 **Table 2.** Age-related changes in retinal layers as measured on OCT. Thickness measurements in  
450 other layers did not show age-related changes.

451

452 Abbreviations: NFL: nerve fiber layer. GCL: ganglion cell layer. IPL: inner plexiform layer.  
453 INL: inner nuclear layer. OPL: outer plexiform layer. ONL: outer nuclear layer. IS: inner  
454 segments. POS: photoreceptor outer segments. RPE: retinal pigmented epithelium. CC:  
455 choriocapillaris. OC: outer choroid. TRT: total retinal thickness.

456

| Age range   | Mean qAF Units |
|-------------|----------------|
| 0-4 years   | 81.1           |
| 5-9 years   | 94.9           |
| 10-14 years | 84.1           |
| 15-19 years | 112.8          |
| 20-24 years | 89.7           |
| 25-30 years | 99.3           |

457

458 **Table 3.** Mean qAF units across age (n=44 primates, 66 eyes). The mean age was 17.1 years  
459 (stdev = 7.1 years). Median was 19.6 years. The mean qAF was 91.4 units (stdev = 31.3 units).  
460 Median was 88.1 units.

461

462

463

464

465

466

467

468

469

470

471

472

473 **References**

- 474 1. Anderson DH, Mullins RF, Hageman GS, Johnson LV. A role for local inflammation in  
475 the formation of drusen in the aging eye. *American Journal of Ophthalmology*.  
476 2002;134(3):411-431. doi:10.1016/S0002-9394(02)01624-0  
477
- 478 2. Anderson M, Dawson WW, Gonzalez-Martinez J, Curcio CA. Drusen and lipid-filled  
479 retinal pigment epithelium cells in a rhesus macula. *Vet Ophthalmol*. 2006;9(3):201-207.  
480 doi:10.1111/j.1463-5224.2006.00463.x  
481
- 482 3. Armenti ST, Bokhour A, Lo D, Smith T. Quantitative fundus autofluorescence in  
483 pseudophakic patients. *Invest Ophthalmol Vis Sci*. 2015;56(2824).  
484
- 485 4. Armenti ST, Greenberg JP, Smith RT. Quantitative Fundus Autofluorescence for the  
486 Evaluation of Retinal Diseases. *J Vis Exp*. Published online 2016.  
487
- 488 5. Cook C, Foster P. Epidemiology of glaucoma: what's new? *Canadian Journal of*  
489 *Ophthalmology*. 2012;47(3):223-226. doi:10.1016/j.jcjo.2012.02.003  
490
- 491 6. Curcio CA, Johnson M, Huang J-D, Rudolf M. Apolipoprotein B-containing lipoproteins  
492 in retinal aging and age-related macular degeneration. *J Lipid Res*. 2010;51(3):451-467.  
493 doi:10.1194/jlr.R002238  
494
- 495 7. Dawson WW, Brooks DE, Hope GM, Samuelson DA, Sherwood MB, Engel HM,  
496 Kessler MJ. Primary open angle glaucoma in the rhesus monkey. *British Journal of*  
497 *Ophthalmology*. 1993; 77: 302-310.  
498
- 499 8. Demirkaya N, Dijk HW van, Schuppen SM van, et al. Effect of Age on Individual  
500 Retinal Layer Thickness in Normal Eyes as Measured With Spectral-Domain Optical  
501 Coherence Tomography. *Invest Ophthalmol Vis Sci*. 2013;54(7):4934-4940.  
502 doi:10.1167/iovs.13-11913  
503
- 504 9. Flores-Moreno I, Lugo F, Duker JS, Ruiz-Moreno JM. The Relationship Between Axial  
505 Length and choroidal Thickness in Eyes with High Myopia. *American Journal of*  
506 *Ophthalmology*. 2013;155(2):314-319.
- 507
- 508 10. Gliem M, Müller PL, Finger RP, McGuinness MB, Holz FG, Charbel Issa P. Quantitative  
509 Fundus Autofluorescence in Early and Intermediate Age-Related Macular Degeneration.  
510 *JAMA Ophthalmol*. 2016;134(7):817–824. doi:10.1001/jamaophthalmol.2016.1475  
511
- 512 11. Goldschmidt E. Refraction in the newborn. *Acta Ophthalmol Copenh*. 1969;47:570–578.  
513
- 514 12. Greenberg JP, Duncker T, Woods RL, Smith RT, Sparrow D JR, F.C. Quantitative  
515 fundus autofluorescence in healthy eyes. *Invest Ophthalmol Vis Sci*. 2013;54:5684–5693.  
516

- 517 13. Khairallah M, Kahloun R, Bourne R, et al. Number of People Blind or Visually Impaired  
518 by Cataract Worldwide and in World Regions, 1990 to 2010. *Invest Ophthalmol Vis Sci.*  
519 2015;56(11):6762-6769. doi:10.1167/iovs.15-17201  
520
- 521 14. Klein BE, Klein R, Linton KL. Intraocular pressure in an American community. The  
522 Beaver Dam Eye Study. *Invest Ophthalmol Vis Sci.* 1992;33(7):2224-2228.  
523 <http://iovs.arvojournals.org/article.aspx?articleid=2179111>  
524
- 525 15. Kuck JFR. Late onset hereditary cataract of the Emory mouse. A model for human senile  
526 cataract. *Experimental Eye Research.* 1990;50(6):659-664. doi:10.1016/0014-  
527 4835(90)90110-G  
528
- 529 16. Levin L, Nilsson S, Ver Hoeve J, Wu S, Kaufman P, Alm A. *Adler's Physiology of the*  
530 *Eye.* Saunders; 2011.  
531
- 532 17. Litts KM, Zhang Y, Freund KB, Curcio CA. OPTICAL COHERENCE TOMOGRAPHY  
533 AND HISTOLOGY OF AGE-RELATED MACULAR DEGENERATION SUPPORT  
534 MITOCHONDRIA AS REFLECTIVITY SOURCES. *Retina.* 2018;38(3):445-461. doi:  
535 10.1097/IAE.0000000000001946.  
536
- 537 18. Moshiri A, Chen R, Kim S. A nonhuman primate model of inherited retinal disease. *J*  
538 *Clin Invest.* 2019;129:863–874.  
539
- 540 19. Mutti DO, Hayes JR, Mitchell GL, Jones LA, Moeschberger ML, Cotter SA, Kleinstein  
541 RN, Manny RE, Twelker JD, Zadnik K. Refractive Error, Axial Length, and Relative  
542 Peripheral Refractive Error before and after the Onset of Myopia. *Invest Ophthalmol Vis*  
543 *Sci.* 2007;48(6):2510-2519.  
544
- 545 20. Ohno-Matsui K. Pathologic Myopia. *Asia Pac J Ophthalmol (Phila).* 2016;5(6):415-423.  
546 doi: 10.1097/APO.0000000000000230.  
547
- 548 21. Palko JR, Morris HJ, Pan X, et al. Influence of Age on Ocular Biomechanical Properties  
549 in a Canine Glaucoma Model with ADAMTS10 Mutation. *PLOS ONE.*  
550 2016;11(6):e0156466. doi:10.1371/journal.pone.0156466  
551
- 552 22. Patel NB, Lim M, Gajjar A, Evans KB, Harweth RS. Age-Associated Changes in the  
553 Retinal Nerve Fiber Layer and Optic Nerve Head. *Invest Ophthalmol Vis Sci.* 2014;  
554 55(3);5134-5143. doi:10.1167/iovs.14-14303.  
555
- 556 23. Ramrattan RS, van der Schaft TL, Mooy CM, de Bruijn WC, Mulder PG, de Jong PT.  
557 Morphometric analysis of Bruch's membrane, the choriocapillaris, and the choroid in  
558 aging. *Invest Ophthalmol Vis Sci.* 1994 May;35(6):2857-64.  
559
- 560 24. Roters S, Hellmich M, Szurman P. Prediction of axial length on the basis of vitreous  
561 body length and lens thickness: retrospective echobiometric study. *J Cataract Refract*  
562 *Surg.* 2002;28:853–859.

- 563  
564  
565  
566  
567  
568  
569  
570  
571  
572  
573  
574  
575  
576  
577  
578  
579  
580  
581  
582  
583  
584  
585  
586  
587  
588  
589  
590  
591  
592  
593  
594  
595  
596  
597  
598  
599  
600  
601  
602  
603  
604  
605  
606  
607  
608
25. Rudolf M, Curcio CA, Schlötzer-Schrehardt U, Sefat AMM, Tura A, Aherrahrou Z, Brinkmann M, Grisanti S, Miura Y, Ranjbar M. Apolipoprotein A-I Mimetic Peptide L-4F Removes Bruch's Membrane Lipids in Aged Nonhuman Primates. *Invest Ophthalmol Vis Sci.* 2019;60(2):461-472. doi: 10.1167/iovs.18-25786. Erratum in: *Invest Ophthalmol Vis Sci.* 2019;60(4):1009.
  26. Ruiz-Medrano J, Flores-Moreno I, Peña-García P, Montero JA, García-Feijóo J, Duker JS, Ruiz-Moreno JM. ANALYSIS OF AGE-RELATED CHOROIDAL LAYERS THINNING IN HEALTHY EYES USING SWEEP-SOURCE OPTICAL COHERENCE TOMOGRAPHY. *Retina.* 2017 Jul;37(7):1305-1313. doi: 10.1097/IAE.0000000000001347.
  27. Silva R. Myopic maculopathy: a review. *Ophthalmologica.* 2012;228(4):197-213. doi: 10.1159/000339893.
  28. Simmons HA. Age-Associated Pathology in Rhesus Macaques (*Macaca mulatta*). *Vet Pathol.* 2016;53(2):399-416. doi:10.1177/0300985815620628
  29. Smith EL, Hung LF, Huang J. Protective Effects of High Ambient Lighting on the Development of Form-Deprivation Myopia in Rhesus Monkeys. *Invest Ophthalmol Vis Sci.* 2012;53(1): 421-428. doi:10.1167/iovs.11-8652.
  30. Stafford TJ, Anness SH, Fine BS. Spontaneous Degenerative Maculopathy in the Monkey. *Ophthalmology.* 1984;91(5):513-521. doi:10.1016/S0161-6420(84)34275-0
  31. Staurenghi G, Sadda S, Chakravarthy U, Spaide RF; International Nomenclature for Optical Coherence Tomography (IN•OCT) Panel. Proposed lexicon for anatomic landmarks in normal posterior segment spectral-domain optical coherence tomography: the IN•OCT consensus. *Ophthalmology.* 2014;121(8):1572-8. doi: 10.1016/j.ophtha.2014.02.023.
  32. Sun N, Shibata B, Hess JF, FitzGerald PG. An alternative means of retaining ocular structure and improving immunoreactivity for light microscopy studies. *Mol Vis.* 2015;21:428-42.
  33. Wang Y, Tran T, Firl K. Quantitative fundus autofluorescence in smokers compared to non-smokers. *Exp Eye Res.* 2019;184:48-55.
  34. Wendt M, Croft MA, McDonald J, Kaufman PL, Glasser A. Lens diameter and thickness as a function of age and pharmacologically stimulated accommodation in rhesus monkeys. *Exp Eye Res.* 2008;86(5):746-752. doi:10.1016/j.exer.2008.01.022
  35. Wong TT, Wong TY, Foster PJ, Crowston JG, Fong C-W, Aung T. The Relationship of Intraocular Pressure with Age, Systolic Blood Pressure, and Central Corneal Thickness in an Asian Population. *Invest Ophthalmol Vis Sci.* 2009;50(9):4097-4102.

609           doi:10.1167/iovs.08-2822

610

611           36. Yiu G, Chung SH, Mollhoff IN, et al. Long-term Evolution and Remodeling of Soft  
612           Drusen in Rhesus Macaques. *Invest Ophthalmol Vis Sci.* 2020;61(2):32-32.

613           doi:10.1167/iovs.61.2.32

614

615           37. Yiu G, Tieu E, Munevar C. In Vivo Multimodal Imaging of Drusenoid Lesions in Rhesus  
616           Macaques. *Sci Rep.* 2017;7(15013).

617

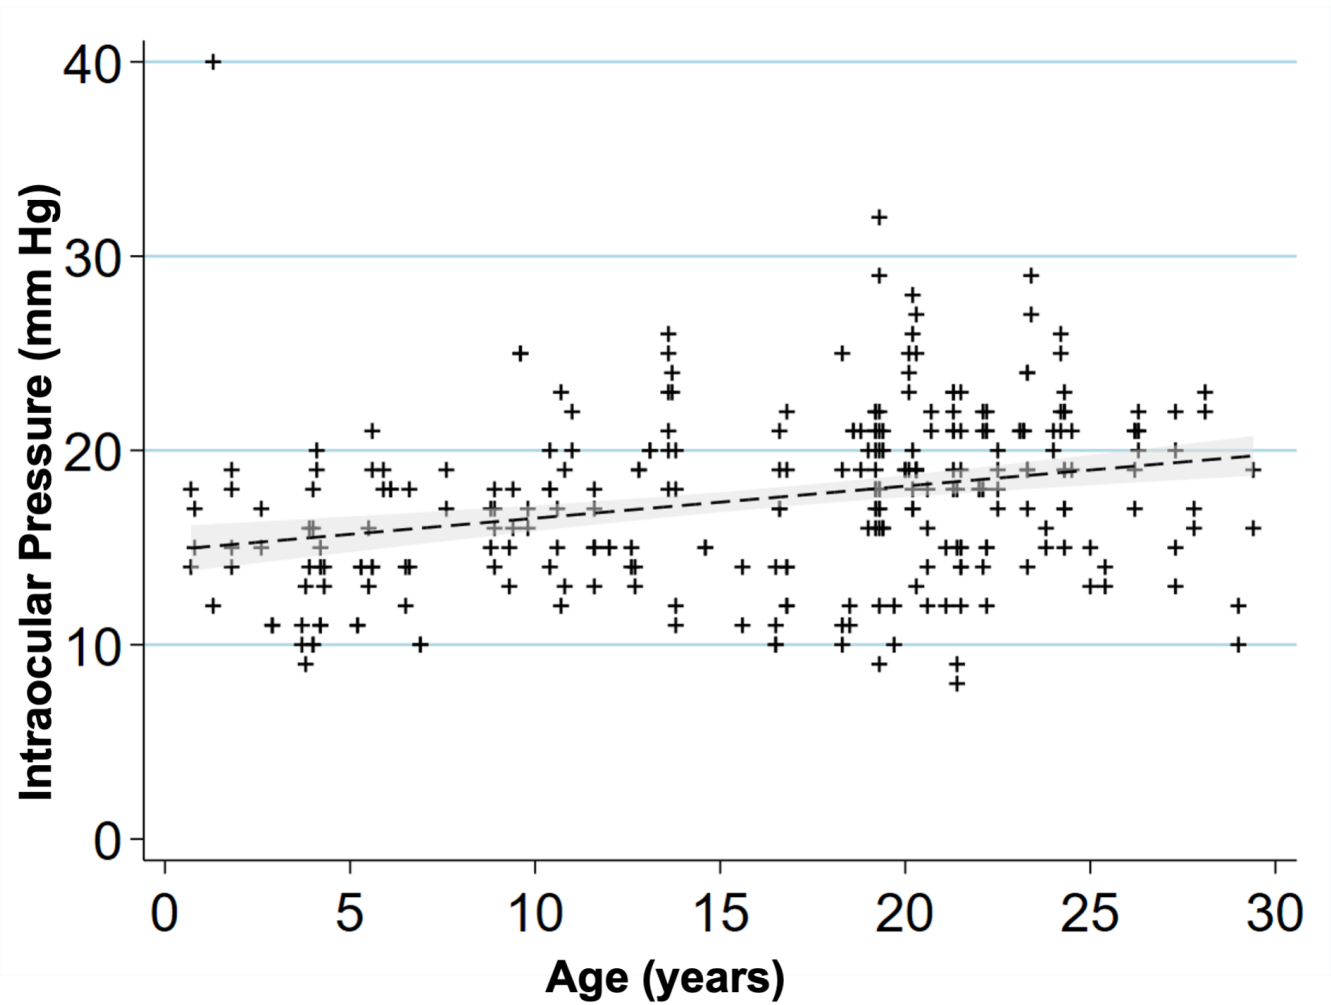



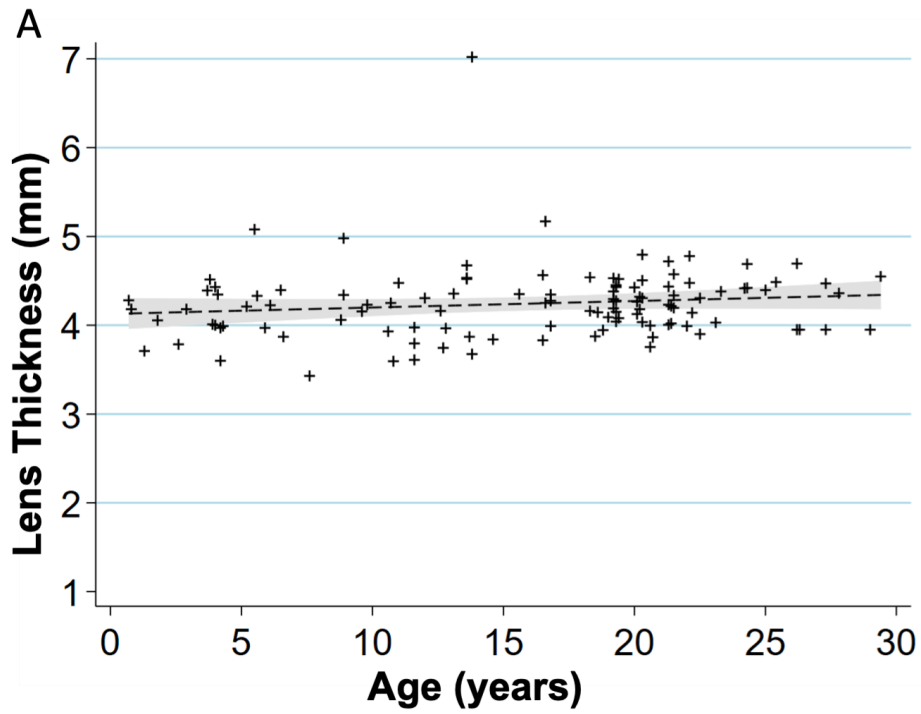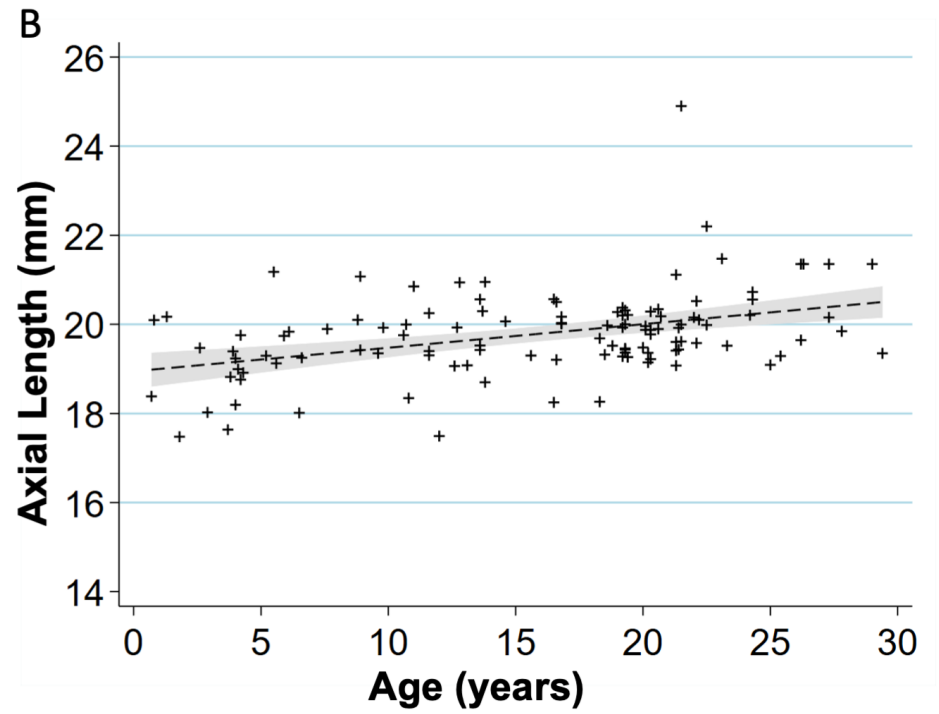

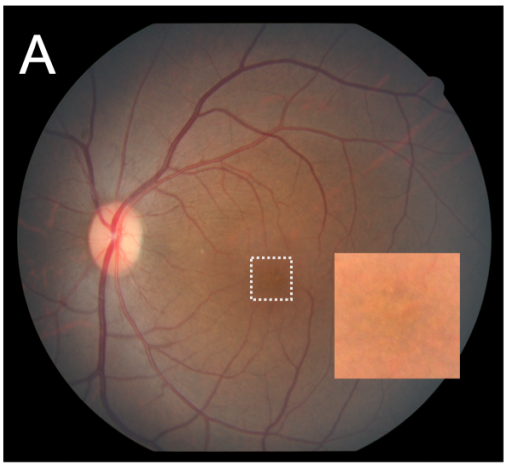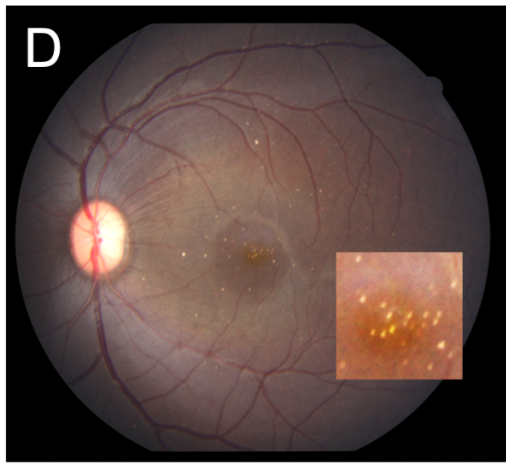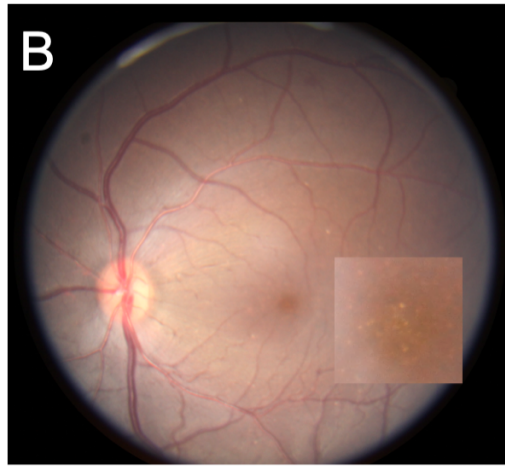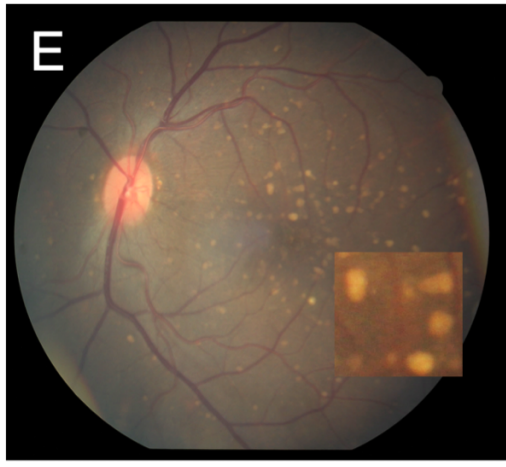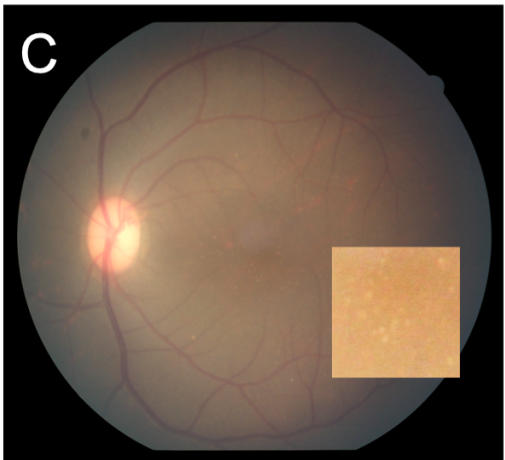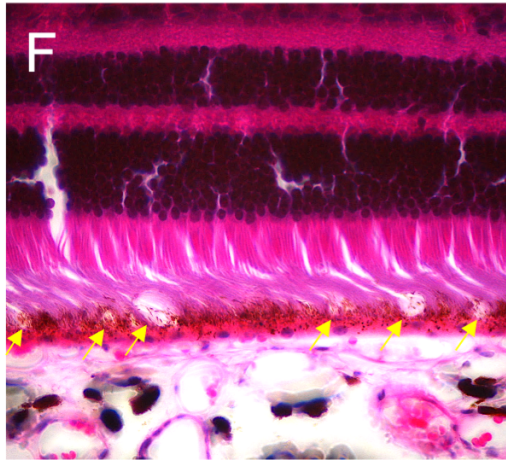

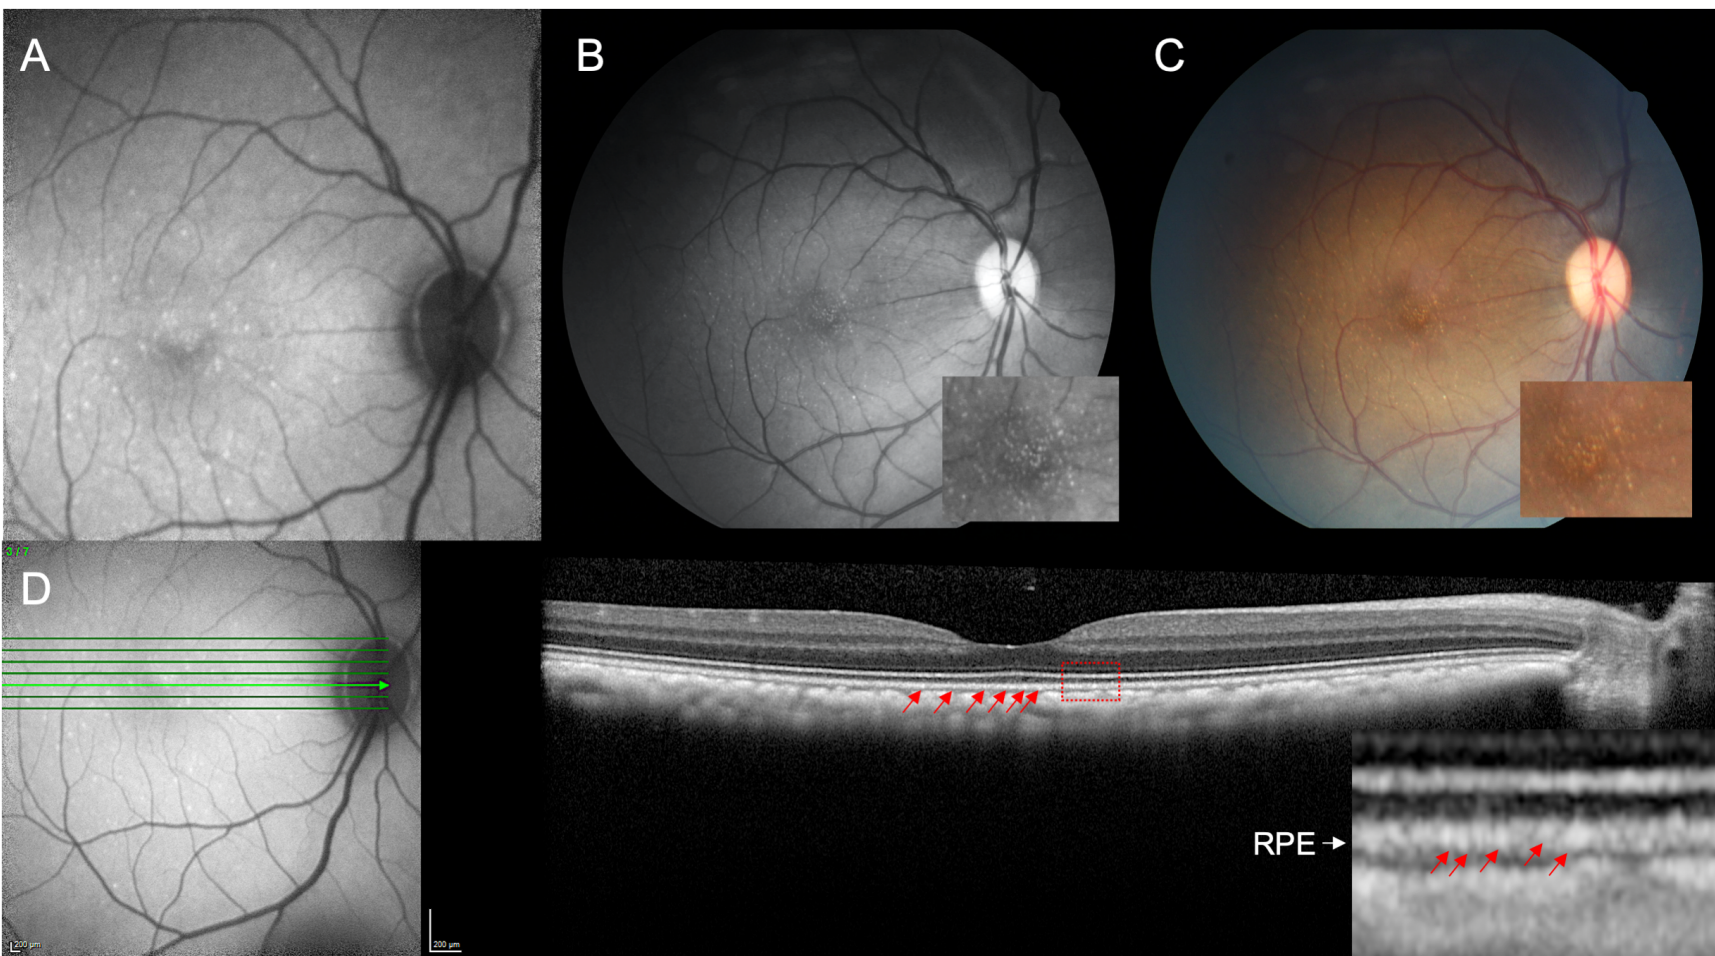

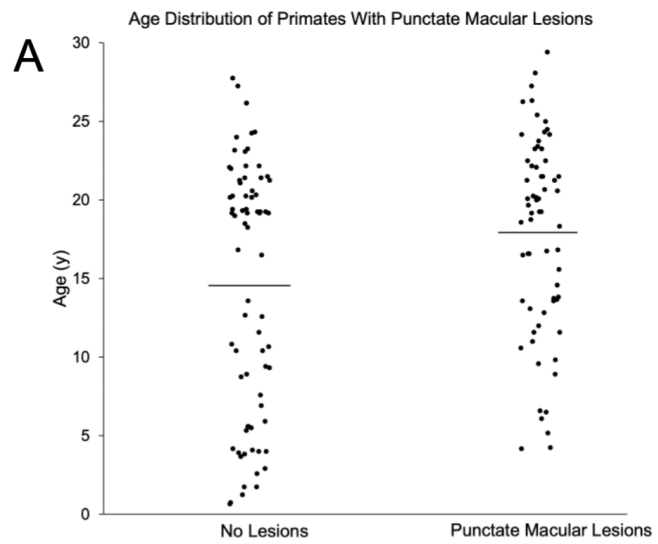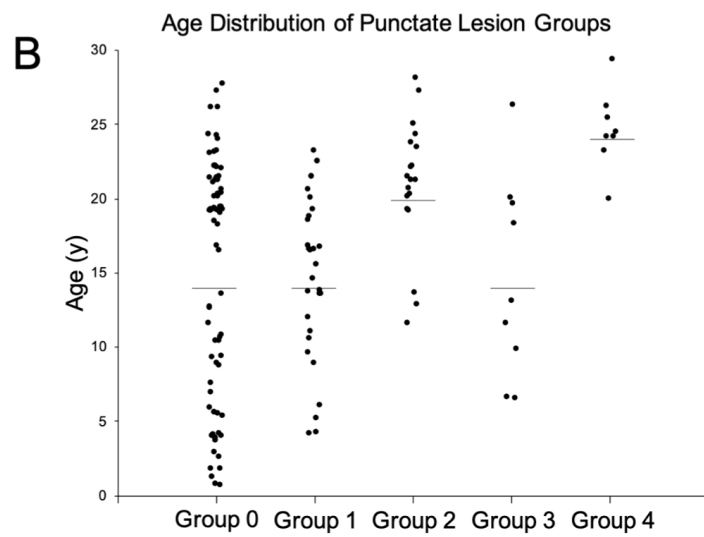

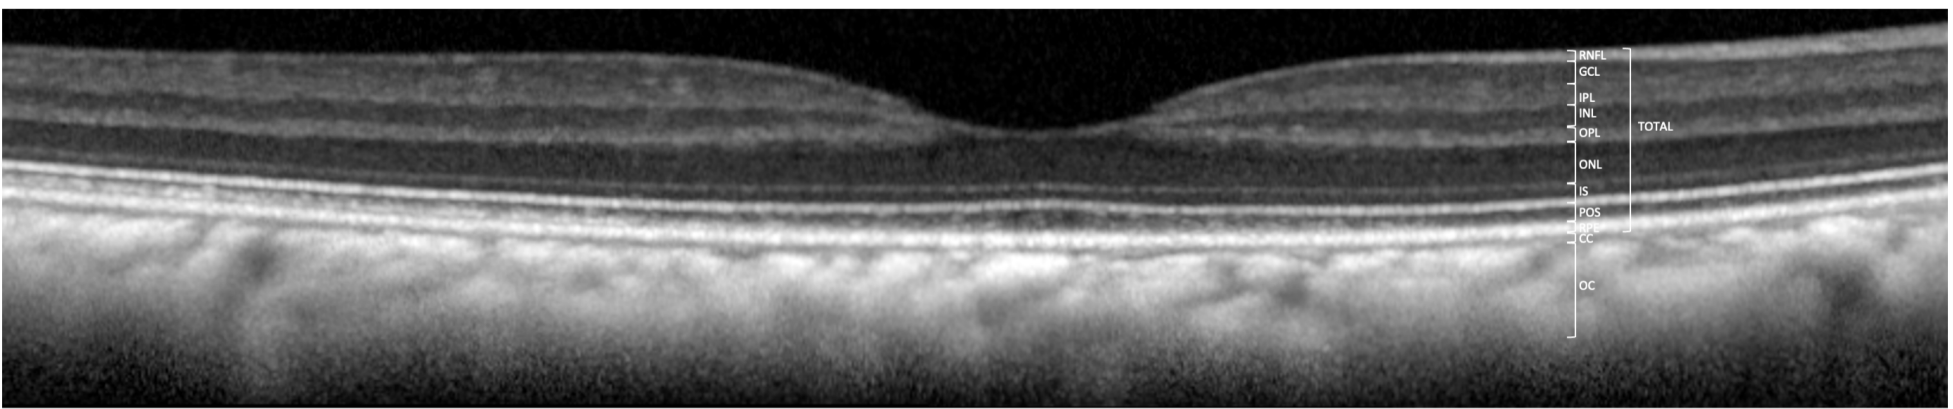

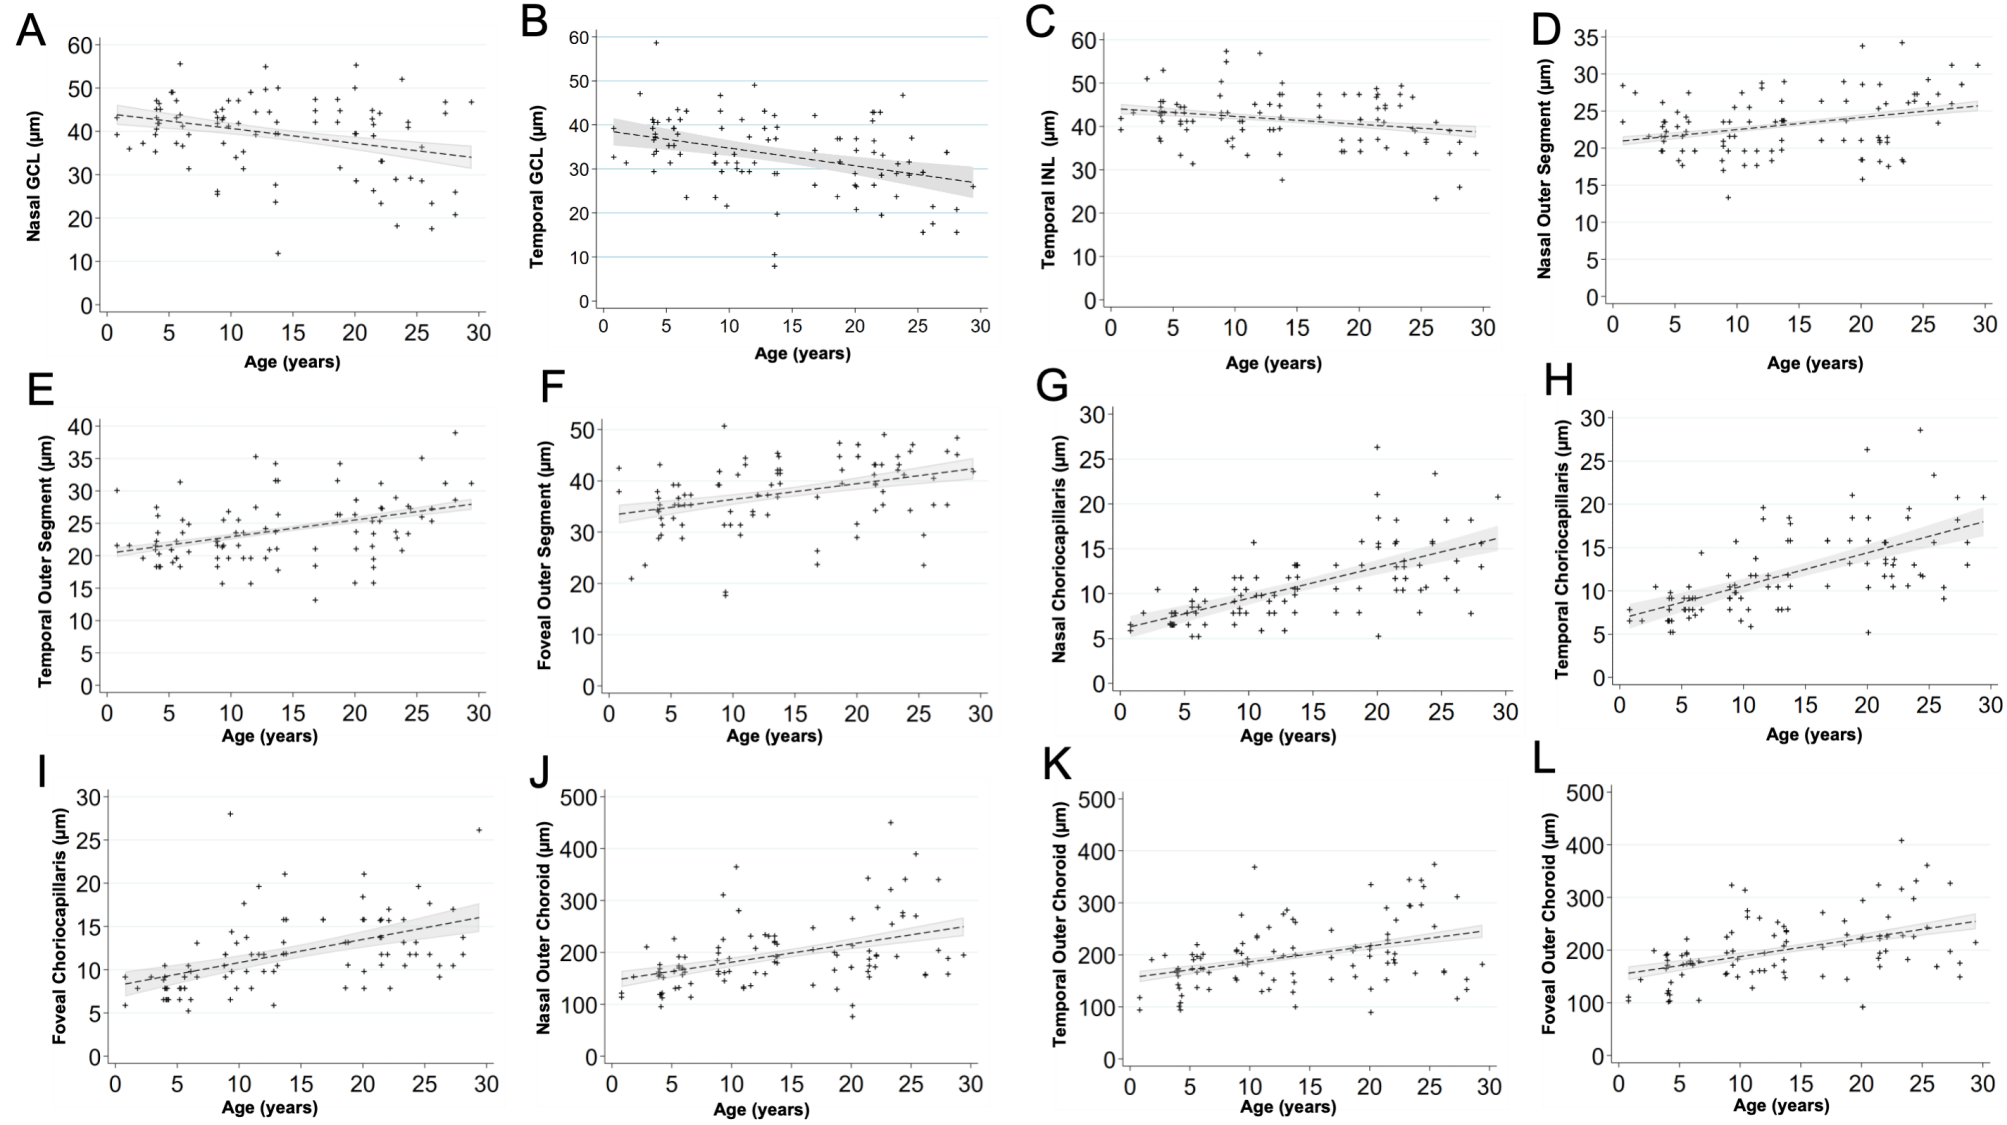

A

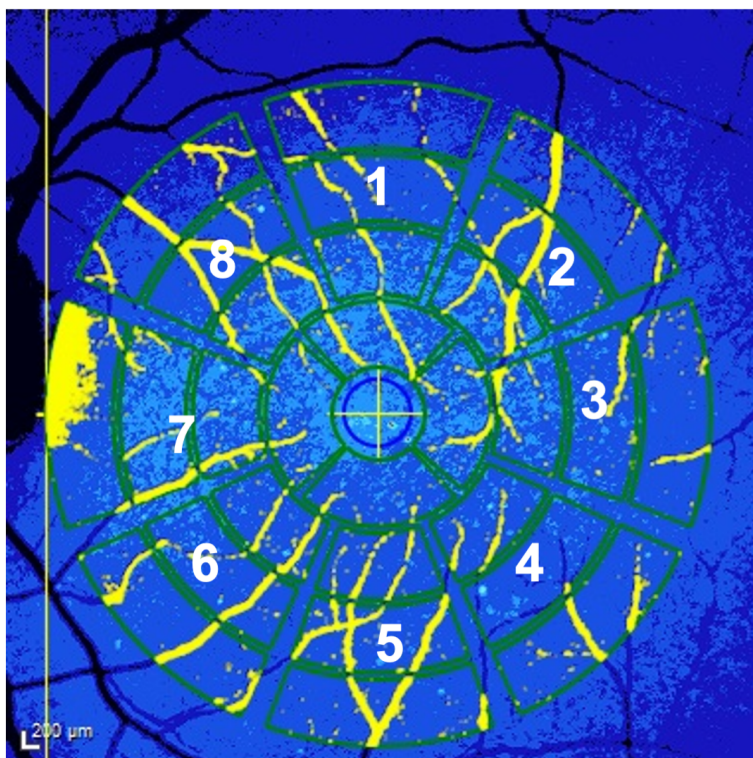

B

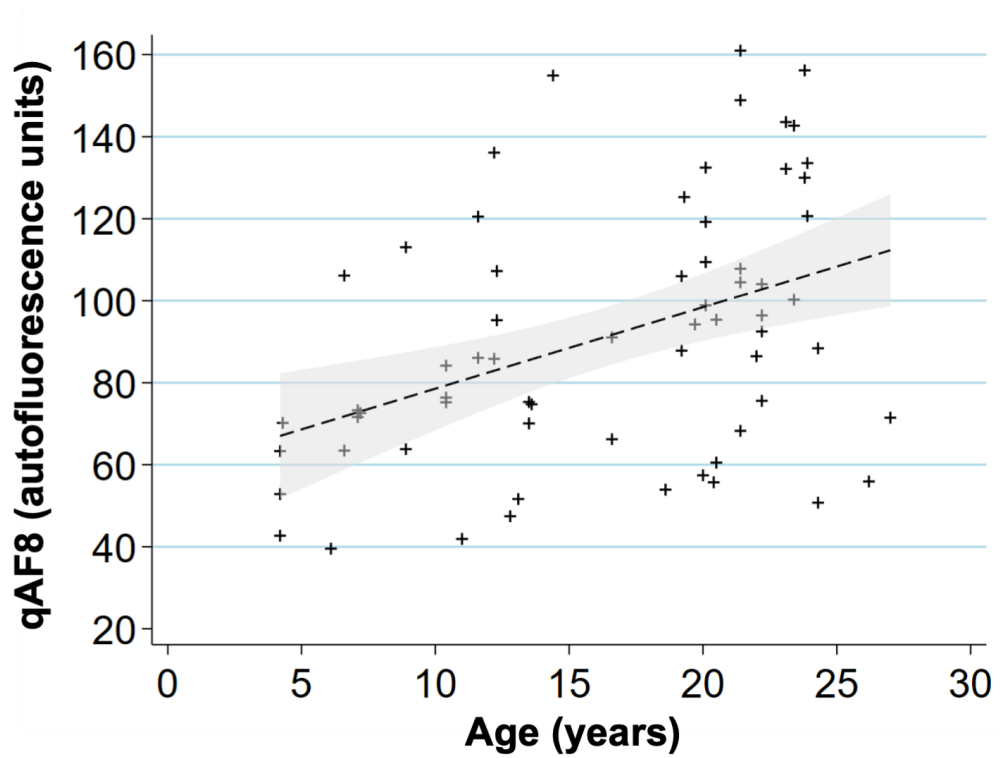

Source: https://biorxiv.org/content/10.1101/2021.07.14.452427v1.full.pdf
